# Supplementary material for: Shotgun metagenomics: a deep insight into the composition and function of the complex microbial world
Source: Research Square preprint supplement (doi:10.21203/rs.3.rs-7581938/v1), 2026-01-30
Supplement: Supplementary file 1 [file 5d496ea91b1c20c5f8783441.xlsx]

## Sheet: Sheet1
genome	kmetaShot Classification	primary_cluster	secondary_cluster	Representative Genome
Enterococcus_faecalis_ATCC_47077	NA	1	1_1	T
Illumina_megahit_bin.13	Enterococcus faecalis TX0309B	1	1_1	F
Illumina_metaSPAdes_bin.2	Enterococcus faecalis TX0309B	1	1_1	F
Nanopore_metaFlye_bin.10	Enterococcus faecalis TX0309B	1	1_1	F
Nanopore_metaMDBG_bin.5	Enterococcus faecalis TX0309B	1	1_1	F
PacBio_metaFlye_bin.5	Enterococcus faecalis TX0309B	1	1_1	F
PacBio_metaMDBG_bin.17	Enterococcus faecalis TX0309B	1	1_1	F
Lactobacillus_gasseri_ATCC_33323	NA	2	2_1	F
Nanopore_metaFlye_bin.12	Lactobacillus gasseri ATCC 33323 = JCM 1131	2	2_1	T
Nanopore_metaMDBG_bin.32	Lactobacillus gasseri ATCC 33323 = JCM 1131	2	2_1	F
PacBio_metaFlye_bin.15	Lactobacillus gasseri ATCC 33323 = JCM 1131	2	2_1	F
PacBio_metaMDBG_bin.4	Lactobacillus gasseri ATCC 33323 = JCM 1131	2	2_1	F
PacBio_metaFlye_bin.17	Staphylococcus epidermidis ATCC 12228	3	3_1	T
PacBio_metaMDBG_bin.18	Staphylococcus epidermidis ATCC 12228	3	3_1	F
Staphylococcus_epidermidis_ATCC_12228	NA	3	3_1	F
Illumina_megahit_bin.2	Staphylococcus aureus H43687	4	4_1	F
PacBio_metaFlye_bin.3	Staphylococcus aureus H43687	4	4_1	F
PacBio_metaMDBG_bin.3	Staphylococcus aureus H43687	4	4_1	T
Staphylococcus_aureus_subsp_aureus_ATCC_BAA_1556	NA	4	4_1	F
Illumina_metaSPAdes_bin.4	Streptococcus agalactiae 2603V/R	5	5_1	F
Nanopore_metaFlye_bin.13	Streptococcus agalactiae 2603V/R	5	5_1	F
Nanopore_metaMDBG_bin.34	Streptococcus agalactiae 2603V/R	5	5_1	F
PacBio_metaFlye_bin.13	Streptococcus agalactiae 2603V/R	5	5_1	F
PacBio_metaMDBG_bin.14	Streptococcus agalactiae 2603V/R	5	5_1	T
Streptococcus_agalactiae_ATCC_BAA_611	NA	5	5_1	F
Illumina_megahit_bin.15	Streptococcus mutans KK21	6	6_1	F
Nanopore_metaFlye_bin.14	Streptococcus mutans UA159	6	6_1	F
Nanopore_metaMDBG_bin.26	Streptococcus mutans KK21	6	6_1	F
PacBio_metaFlye_bin.14	Streptococcus mutans UA159	6	6_1	F
PacBio_metaMDBG_bin.15	Streptococcus mutans KK21	6	6_1	F
Streptococcus_mutans_ATCC_700610	NA	6	6_1	T
Illumina_megahit_bin.7	Phocaeicola vulgatus ATCC 8482	7	7_1	F
Illumina_metaSPAdes_bin.21	Phocaeicola vulgatus ATCC 8482	7	7_1	F
Nanopore_metaFlye_bin.18	Phocaeicola vulgatus ATCC 8482	7	7_1	F
PacBio_metaFlye_bin.1	Phocaeicola vulgatus ATCC 8482	7	7_1	T
PacBio_metaMDBG_bin.12	Phocaeicola vulgatus ATCC 8482	7	7_1	F
Phocaeicola_vulgatus_ATCC_8482	NA	7	7_1	F
Illumina_megahit_bin.16	Porphyromonas gingivalis 381	8	8_1	F
Illumina_metaSPAdes_bin.15	Porphyromonas gingivalis 381	8	8_1	F
Nanopore_metaFlye_bin.3	Porphyromonas gingivalis ATCC 33277	8	8_1	F
PacBio_metaFlye_bin.7	Porphyromonas gingivalis ATCC 33277	8	8_1	F
PacBio_metaMDBG_bin.8	Porphyromonas gingivalis ATCC 33277	8	8_1	F
Porphyromonas_gingivalis_ATCC_33277	NA	8	8_1	T
Cutibacterium_acnes_ATCC_11828	NA	9	9_1	F
Illumina_megahit_bin.14	Cutibacterium acnes subsp. defendens ATCC 11828	9	9_1	F
Illumina_metaSPAdes_bin.3	Cutibacterium acnes subsp. defendens ATCC 11828	9	9_1	F
Nanopore_metaFlye_bin.1	Cutibacterium acnes subsp. defendens ATCC 11828	9	9_1	F
Nanopore_metaMDBG_bin.11	Cutibacterium acnes subsp. defendens ATCC 11828	9	9_1	F
PacBio_metaFlye_bin.6	Cutibacterium acnes subsp. defendens ATCC 11828	9	9_1	F
PacBio_metaMDBG_bin.7	Cutibacterium acnes subsp. defendens ATCC 11828	9	9_1	T
Illumina_megahit_bin.11	Pseudomonas aeruginosa	10	10_1	F
Illumina_metaSPAdes_bin.6	Pseudomonas aeruginosa	10	10_1	F
Nanopore_metaFlye_bin.7	Pseudomonas aeruginosa	10	10_1	F
Nanopore_metaMDBG_bin.29	Pseudomonas aeruginosa	10	10_1	F
PacBio_metaFlye_bin.9	Pseudomonas aeruginosa	10	10_1	F
PacBio_metaMDBG_bin.6	Pseudomonas aeruginosa	10	10_1	F
Pseudomonas_aeruginosa_ATCC_9027	NA	10	10_1	T
Escherichia_coli_ATCC_700926	NA	11	11_1	F
Illumina_megahit_bin.19	Escherichia coli O157:H7 str. 2011EL-2099	11	11_1	F
Illumina_metaSPAdes_bin.10	Escherichia coli O157:H7 str. 2011EL-2099	11	11_1	F
Nanopore_metaFlye_bin.17	Escherichia coli O157:H7 str. 2011EL-2099	11	11_1	F
Nanopore_metaMDBG_bin.31	Escherichia coli O157:H7 str. 2011EL-2099	11	11_1	F
PacBio_metaFlye_bin.2	Escherichia coli O157:H7 str. 2011EL-2099	11	11_1	F
PacBio_metaMDBG_bin.2	Escherichia coli O157:H7 str. 2011EL-2099	11	11_1	T
Acinetobacter_baumannii_ATCC_17978	NA	12	12_1	F
Illumina_megahit_bin.8	Acinetobacter baumannii ATCC 17978	12	12_1	F
Illumina_metaSPAdes_bin.19	Acinetobacter baumannii ATCC 17978	12	12_1	F
Nanopore_metaFlye_bin.8	Acinetobacter baumannii ATCC 17978	12	12_1	F
Nanopore_metaMDBG_bin.7	Acinetobacter baumannii ATCC 17978	12	12_1	F
PacBio_metaFlye_bin.18	Acinetobacter baumannii ATCC 17978	12	12_1	F
PacBio_metaMDBG_bin.1	Acinetobacter baumannii ATCC 17978	12	12_1	T
Clostridium_beijerinckii_ATCC_35702	NA	13	13_1	F
Illumina_megahit_bin.17	Clostridium beijerinckii NCIMB 8052	13	13_1	F
Illumina_metaSPAdes_bin.1	Clostridium beijerinckii NCIMB 8052	13	13_1	F
Nanopore_metaFlye_bin.6	Clostridium beijerinckii NCIMB 8052	13	13_1	T
Nanopore_metaMDBG_bin.9	Clostridium beijerinckii ATCC 35702	13	13_1	F
PacBio_metaFlye_bin.16	Clostridium beijerinckii ATCC 35702	13	13_1	F
PacBio_metaMDBG_bin.16	Clostridium beijerinckii NCIMB 8052	13	13_1	F
Bifidobacterium_adolescentis_ATCC_15703	NA	14	14_1	T
Illumina_megahit_bin.18	Bifidobacterium adolescentis ATCC 15703	14	14_1	F
Illumina_metaSPAdes_bin.16	Bifidobacterium adolescentis ATCC 15703	14	14_1	F
Nanopore_metaFlye_bin.9	Bifidobacterium adolescentis ATCC 15703	14	14_1	F
PacBio_metaMDBG_bin.19	Bifidobacterium adolescentis ATCC 15703	14	14_1	F
Illumina_megahit_bin.6	Schaalia odontolytica ATCC 17982	15	15_1	F
Illumina_metaSPAdes_bin.12	Schaalia odontolytica ATCC 17982	15	15_1	F
Nanopore_metaFlye_bin.11	Schaalia odontolytica ATCC 17982	15	15_1	F
Nanopore_metaMDBG_bin.24	Schaalia odontolytica ATCC 17982	15	15_1	F
Schaalia_odontolytica_ATCC_17982	NA	15	15_1	T
Illumina_megahit_bin.1	Cereibacter sphaeroides	16	16_1	F
Illumina_metaSPAdes_bin.13	Cereibacter sphaeroides	16	16_1	F
Nanopore_metaFlye_bin.16	Cereibacter sphaeroides	16	16_1	F
Nanopore_metaMDBG_bin.13	Cereibacter sphaeroides	16	16_1	F
PacBio_metaFlye_bin.11	Cereibacter sphaeroides	16	16_1	T
PacBio_metaMDBG_bin.11	Cereibacter sphaeroides	16	16_1	F
Rhodobacter_sphaeroides_ATCC_17029	NA	16	16_1	F
Deinococcus_radiodurans_ATCC_BAA_816	NA	17	17_1	F
Illumina_megahit_bin.3	Deinococcus radiodurans ATCC 13939	17	17_1	F
Illumina_metaSPAdes_bin.18	Deinococcus radiodurans ATCC 13939	17	17_1	F
Nanopore_metaFlye_bin.15	Deinococcus radiodurans DSM 20539	17	17_1	F
Nanopore_metaMDBG_bin.1	Deinococcus radiodurans ATCC 13939	17	17_1	F
PacBio_metaFlye_bin.8	Deinococcus radiodurans ATCC 13939	17	17_1	T
PacBio_metaMDBG_bin.10	Deinococcus radiodurans ATCC 13939	17	17_1	F
Helicobacter_pylori_ATCC_700392	NA	18	18_1	F
Illumina_megahit_bin.9	Helicobacter pylori	18	18_1	F
Illumina_metaSPAdes_bin.7	Helicobacter pylori	18	18_1	F
Nanopore_metaFlye_bin.4	Helicobacter pylori	18	18_1	F
PacBio_metaFlye_bin.10	Helicobacter pylori	18	18_1	F
PacBio_metaMDBG_bin.5	Helicobacter pylori	18	18_1	T
Illumina_megahit_bin.5	Neisseria meningitidis NM576	19	19_1	F
Illumina_metaSPAdes_bin.11	Neisseria meningitidis NM576	19	19_1	F
Nanopore_metaFlye_bin.5	Neisseria meningitidis MC58	19	19_1	F
Nanopore_metaMDBG_bin.8	Neisseria meningitidis NM576	19	19_1	F
Neisseria_meningitidis_ATCC_BAA_335	NA	19	19_1	F
PacBio_metaFlye_bin.12	Neisseria meningitidis MC58	19	19_1	T
PacBio_metaMDBG_bin.13	Neisseria meningitidis MC58	19	19_1	F
Bacillus_pacificus_ATCC_10987	NA	20	20_1	T
Illumina_megahit_bin.10	Bacillus cereus ATCC 10987	20	20_1	F
Illumina_metaSPAdes_bin.8	Bacillus cereus ATCC 10987	20	20_1	F
Nanopore_metaFlye_bin.2	Bacillus cereus ATCC 10987	20	20_1	F
Nanopore_metaMDBG_bin.22	Bacillus cereus ATCC 10987	20	20_1	F
PacBio_metaMDBG_bin.20	Bacillus cereus ATCC 10987	20	20_1	F
