# Supplementary material for: Shotgun metagenomics: a deep insight into the composition and function of the complex microbial world
Source: Research Square preprint supplement (doi:10.21203/rs.3.rs-7581938/v1), 2026-01-30
Supplement: Supplementary file 2 [file 67d7d176695c229e8cf78b72.xlsx]

## Sheet: BIN Stats
BIN	completeness	contamination	GC	N50	size	organism_name	quality	Tech	Expected genome size	% covered
Illumina_megahit_bin.8	97.8	0.273	0.388	367837	3880084	Acinetobacter baumannii ATCC 17978	High	Illumina_megahit	3902113	0.994355
Illumina_megahit_bin.10	98.61	0.33	0.352	457084	5403228	Bacillus cereus ATCC	High	Illumina_megahit	5235074	1.03212
Illumina_megahit_bin.18	100	0	0.591	228457	2055857	Bifidobacterium adolescentis ATCC 15703	High	Illumina_megahit	2028350	1.01356
Illumina_megahit_bin.1	99.39	0.151	0.691	329657	4394173	Cereibacter sphaeroides	High	Illumina_megahit	3146984	1.39631
Illumina_megahit_bin.17	99.19	2.419	0.295	132255	5881379	Clostridium beijerinckii NCIMB 8052	High	Illumina_megahit	6007460	0.979013
Illumina_megahit_bin.14	100	0	0.6	703523	2505653	Cutibacterium acnes subsp. defendens ATCC 11828	High	Illumina_megahit	2497484	1.00327
Illumina_megahit_bin.3	99.57	0.212	0.671	149676	3022842	Deinococcus radiodurans ATCC 13939	High	Illumina_megahit	2644044	1.14326
Illumina_megahit_bin.13	99.62	0	0.377	371431	2640839	Enterococcus faecalis TX0309B	High	Illumina_megahit	2738556	0.964318
Illumina_megahit_bin.19	99.96	0.037	0.507	133182	4513547	Escherichia coli O157:H7 str. 2011EL-2099	High	Illumina_megahit	4642497	0.972224
Illumina_megahit_bin.9	99.36	0	0.39	86515	1545117	Helicobacter pylori	High	Illumina_megahit	1667794	0.926444
Illumina_megahit_bin.4	57.36	0	0.351	576732	1148774	Lactobacillus gasseri ATCC 33323 = JCM 1131	Medium	Illumina_megahit	1854273	0.619528
Illumina_megahit_bin.5	99.36	0.19	0.522	23271	2001948	Neisseria meningitidis NM576	High	Illumina_megahit	2240102	0.893686
Illumina_megahit_bin.7	99.24	0.188	0.42	126040	5009291	Phocaeicola vulgatus ATCC 8482	High	Illumina_megahit	5163177	0.970195
Illumina_megahit_bin.16	99.92	0	0.488	41985	2185310	Porphyromonas gingivalis 381	High	Illumina_megahit	2399479	0.910744
Illumina_megahit_bin.11	99.35	0.454	0.667	323233	6264610	Pseudomonas aeruginosa	High	Illumina_megahit	6374461	0.982767
Illumina_megahit_bin.6	100	0.473	0.655	238029	2360324	Schaalia odontolytica ATCC 17982	High	Illumina_megahit	2396044	0.985092
Illumina_megahit_bin.2	76.63	1.203	0.326	146649	2229915	Staphylococcus aureus H43687	Medium	Illumina_megahit	2472647	0.901833
Illumina_megahit_bin.15	99.25	2.247	0.366	121599	2031737	Streptococcus mutans KK21	High	Illumina_megahit	2031444	1.00014
Illumina_metaSPAdes_bin.19	100	0.273	0.388	942607	3848825	Acinetobacter baumannii ATCC 17978	High	Illumina_metaSPAdes	3902113	0.986344
Illumina_metaSPAdes_bin.8	96.75	0.352	0.354	354194	5067803	Bacillus cereus ATCC 10987	High	Illumina_metaSPAdes	5235074	0.968048
Illumina_metaSPAdes_bin.16	100	0	0.591	381508	2055608	Bifidobacterium adolescentis ATCC 15703	High	Illumina_metaSPAdes	2028350	1.01344
Illumina_metaSPAdes_bin.13	99.39	0.151	0.691	361822	4393805	Cereibacter sphaeroides	High	Illumina_metaSPAdes	3146984	1.3962
Illumina_metaSPAdes_bin.1	99.19	1.612	0.295	240022	5869179	Clostridium beijerinckii NCIMB 8052	High	Illumina_metaSPAdes	6007460	0.976982
Illumina_metaSPAdes_bin.3	100	0	0.6	713588	2499598	Cutibacterium acnes subsp. defendens ATCC 11828	High	Illumina_metaSPAdes	2497484	1.00085
Illumina_metaSPAdes_bin.18	99.57	0.212	0.671	155723	3020337	Deinococcus radiodurans ATCC 13939	High	Illumina_metaSPAdes	2644044	1.14232
Illumina_metaSPAdes_bin.2	99.62	0	0.376	377731	2720870	Enterococcus faecalis TX0309B	High	Illumina_metaSPAdes	2738556	0.993542
Illumina_metaSPAdes_bin.10	99.96	0.037	0.507	133138	4520004	Escherichia coli O157:H7 str. 2011EL-2099	High	Illumina_metaSPAdes	4642497	0.973615
Illumina_metaSPAdes_bin.7	99.36	0.271	0.388	82452	1637036	Helicobacter pylori	High	Illumina_metaSPAdes	1667794	0.981558
Illumina_metaSPAdes_bin.20	60.34	0	0.347	659669	1070183	Lactobacillus gasseri ATCC 33323 = JCM 1131	Medium	Illumina_metaSPAdes	1854273	0.577144
Illumina_metaSPAdes_bin.11	99.55	0.19	0.519	58616	2050388	Neisseria meningitidis NM576	High	Illumina_metaSPAdes	2240102	0.91531
Illumina_metaSPAdes_bin.21	98.86	0.943	0.421	149563	5034528	Phocaeicola vulgatus ATCC 8482	High	Illumina_metaSPAdes	5163177	0.975083
Illumina_metaSPAdes_bin.15	98.97	0	0.488	81643	2073505	Porphyromonas gingivalis 381	High	Illumina_metaSPAdes	2399479	0.864148
Illumina_metaSPAdes_bin.6	100	0.454	0.667	444259	6294857	Pseudomonas aeruginosa	High	Illumina_metaSPAdes	6374461	0.987512
Illumina_metaSPAdes_bin.12	100	0.473	0.655	346638	2365759	Schaalia odontolytica ATCC 17982	High	Illumina_metaSPAdes	2396044	0.98736
Illumia_metaSPAdes_bin.5	62.06	0	0.32	699902	999318	Staphylococcus aureus H43687	Medium	Illumina_metaSPAdes	2472647	0.404149
Illumina_metaSPAdes_bin.14	52.24	0	0.319	120987	1382822	Staphylococcus epidermidis NIH04008	Medium	Illumina_metaSPAdes	2503245	0.552412
Illumina_metaSPAdes_bin.4	86.17	0.177	0.355	165514	1785621	Streptococcus agalactiae 2603V/R	Medium	Illumina_metaSPAdes	2159783	0.826759
Illumina_metaSPAdes_bin.17	66.38	0	0.368	171112	1193432	Streptococcus mutans KK21	Medium	Illumina_metaSPAdes	2031444	0.58748
Nanopore_Metaflye_bin.8	100	0.273	0.389	3902077	3902077	Acinetobacter baumannii ATCC 17978	High	Nanopore_Metaflye	3902113	0.999991
Nanopore_Metaflye_bin.2	98.61	0.352	0.353	709389	5552566	Bacillus cereus ATCC 10987	High	Nanopore_Metaflye	5235074	1.06065
Nanopore_Metaflye_bin.9	97.85	0.303	0.591	437920	2112939	Bifidobacterium adolescentis ATCC 15703	High	Nanopore_Metaflye	2028350	1.0417
Nanopore_Metaflye_bin.16	96.82	0.151	0.689	3129016	4470667	Cereibacter sphaeroides/Rhodobacter_sphaeroides	High	Nanopore_Metaflye	3146984	1.42062
Nanopore_Metaflye_bin.6	99.19	1.612	0.298	6008599	6036305	Clostridium beijerinckii NCIMB 8052	High	Nanopore_Metaflye	6007460	1.0048
Nanopore_Metaflye_bin.1	100	0	0.6	1369497	2497466	Cutibacterium acnes subsp. defendens ATCC 11828	High	Nanopore_Metaflye	2497484	0.999993
Nanopore_Metaflye_bin.15	98.72	0.212	0.668	2173856	3257712	Deinococcus radiodurans DSM 20539	High	Nanopore_Metaflye	2644044	1.23209
Nanopore_Metaflye_bin.10	99.62	0	0.377	1955092	2749732	Enterococcus faecalis TX0309B	High	Nanopore_Metaflye	2738556	1.00408
Nanopore_Metaflye_bin.17	99.96	0.037	0.507	4642527	4653322	Escherichia coli O157:H7 str. 2011EL-2099	High	Nanopore_Metaflye	4642497	1.00233
Nanopore_Metaflye_bin.4	96.36	0.203	0.399	1667850	1828045	Helicobacter pylori	High	Nanopore_Metaflye	1667794	1.09609
Nanopore_Metaflye_bin.12	98.44	0	0.352	1854246	1854246	Lactobacillus gasseri ATCC 33323 = JCM 1131	High	Nanopore_Metaflye	1854273	0.999985
Nanopore_Metaflye_bin.5	95.61	0.19	0.514	2227176	2227176	Neisseria meningitidis MC58	High	Nanopore_Metaflye	2240102	0.99423
Nanopore_Metaflye_bin.18	97.72	0.188	0.421	1004576	5084002	Phocaeicola vulgatus ATCC 8482	High	Nanopore_Metaflye	5163177	0.984665
Nanopore_Metaflye_bin.3	98.4	0	0.483	715594	2439574	Porphyromonas gingivalis ATCC 33277	High	Nanopore_Metaflye	2399479	1.01671
Nanopore_Metaflye_bin.7	99.75	0.4	0.666	6374455	6374455	Pseudomonas aeruginosa	High	Nanopore_Metaflye	6374461	0.999999
Nanopore_Metaflye_bin.11	98.45	0.473	0.654	1286954	2397432	Schaalia odontolytica ATCC 17982	High	Nanopore_Metaflye	2396044	1.00058
Nanopore_Metaflye_bin.13	97.41	0.177	0.356	393625	2143626	Streptococcus agalactiae 2603V/R	High	Nanopore_Metaflye	2159783	0.992519
Nanopore_Metaflye_bin.14	97.8	0	0.367	689160	2006928	Streptococcus mutans UA159	High	Nanopore_Metaflye	2031444	0.987932
Nanopore_metaMDBG_bin.7	87.89	2.214	0.388	359289	3483904	Acinetobacter baumannii ATCC 17978	Medium	Nanopore_metaMDBG	3902113	0.892825
Nanopore_metaMDBG_bin.22	82.6	4.251	0.352	24278	4643700	Bacillus cereus ATCC 10987	Medium	Nanopore_metaMDBG	5235074	0.887036
Nanopore_metaMDBG_bin.28	41	2.575	0.601	16802	735908	Bifidobacterium adolescentis ATCC 15703	Low	Nanopore_metaMDBG	2028350	0.362811
Nanopore_metaMDBG_bin.13	89.45	7.777	0.691	39778	4546199	Cereibacter sphaeroides/Rhodobacter_sphaeroides	Medium	Nanopore_metaMDBG	3146984	1.44462
Nanopore_metaMDBG_bin.9	89.11	3.629	0.297	79985	5244831	Clostridium beijerinckii ATCC 35702	Medium	Nanopore_metaMDBG	6007460	0.873053
Nanopore_metaMDBG_bin.11	92.26	3.101	0.6	160653	2356193	Cutibacterium acnes subsp. defendens ATCC 11828	High	Nanopore_metaMDBG	2497484	0.943427
Nanopore_metaMDBG_bin.18	22.92	5.833	0.594	16698	936113	Cutibacterium acnes subsp. defendens ATCC 11828	Low	Nanopore_metaMDBG	2497484	0.374822
Nanopore_metaMDBG_bin.1	92.41	8.156	0.669	32638	3311290	Deinococcus radiodurans ATCC 13939	Medium	Nanopore_metaMDBG	2644044	1.25236
Nanopore_metaMDBG_bin.5	91.52	3.819	0.377	30259	2643170	Enterococcus faecalis TX0309B	High	Nanopore_metaMDBG	2738556	0.965169
Nanopore_metaMDBG_bin.31	99.81	0.037	0.507	4642452	4642452	Escherichia coli O157:H7 str. 2011EL-2099	High	Nanopore_metaMDBG	4642497	0.99999
Nanopore_metaMDBG_bin.33	66.6	6.482	0.385	35794	1551526	Helicobacter pylori HP260AFii	Medium	Nanopore_metaMDBG	1667794	0.930286
Nanopore_metaMDBG_bin.6	45.84	17.89	0.386	10125	1553955	Helicobacter pylori Iso8	Low	Nanopore_metaMDBG	1667794	0.931743
Nanopore_metaMDBG_bin.32	92.96	3.52	0.349	74186	1738903	Lactobacillus gasseri ATCC 33323 = JCM 1131	High	Nanopore_metaMDBG	1854273	0.937782
Nanopore_metaMDBG_bin.8	81.88	0.57	0.511	371452	1898576	Neisseria meningitidis NM576	Medium	Nanopore_metaMDBG	2240102	0.84754
Nanopore_metaMDBG_bin.16	73.89	1.509	0.416	58868	3744527	Phocaeicola vulgatus ATCC 8482	Medium	Nanopore_metaMDBG	5163177	0.725237
Nanopore_metaMDBG_bin.14	24.13	1.724	0.483	28886	644924	Porphyromonas gingivalis ATCC 33277	Low	Nanopore_metaMDBG	2399479	0.268777
Nanopore_metaMDBG_bin.17	35.45	0	0.484	39326	654668	Porphyromonas gingivalis W50	Low	Nanopore_metaMDBG	2399479	0.272838
Nanopore_metaMDBG_bin.29	82.85	2.325	0.67	69718	5113400	Pseudomonas aeruginosa	Medium	Nanopore_metaMDBG	6374461	0.80217
Nanopore_metaMDBG_bin.24	81.08	5.252	0.658	19686	1963314	Schaalia odontolytica ATCC 17982	Medium	Nanopore_metaMDBG	2396044	0.819398
Nanopore_metaMDBG_bin.36	71.25	16.58	0.322	65834	2409349	Staphylococcus aureus H43687	Low	Nanopore_metaMDBG	2472647	0.974401
Nanopore_metaMDBG_bin.12	66.09	5.917	0.323	282705	2163117	Staphylococcus epidermidis VCU126	Medium	Nanopore_metaMDBG	2503245	0.864125
Nanopore_metaMDBG_bin.19	21.25	1.966	0.314	511139	690052	Staphylococcus epidermidis VCU126	Low	Nanopore_metaMDBG	2503245	0.275663
Nanopore_metaMDBG_bin.34	86.35	3.221	0.353	40057	1884038	Streptococcus agalactiae 2603V/R	Medium	Nanopore_metaMDBG	2159783	0.872327
Nanopore_metaMDBG_bin.26	85.35	8.233	0.368	40574	1760000	Streptococcus mutans KK21	Medium	Nanopore_metaMDBG	2031444	0.866379
PacBio_Metaflye_bin.18	100	0.273	0.389	3909339	3924869	Acinetobacter baumannii ATCC 17978	High	PacBio_Metaflye	3902113	1.00583
PacBio_Metaflye_bin.19	48.7	0.668	0.357	30541	2588053	Bacillus cereus ATCC 10987	Low	PacBio_Metaflye	5235074	0.494368
PacBio_Metaflye_bin.4	55.56	0.056	0.597	38772	1229803	Bifidobacterium adolescentis ATCC 15703	Medium	PacBio_Metaflye	2028350	0.606307
PacBio_Metaflye_bin.11	99.39	0.151	0.689	3129042	4470702	Cereibacter sphaeroides/Rhodobacter_sphaeroides	High	PacBio_Metaflye	3146984	1.42063
PacBio_Metaflye_bin.16	96.85	2.62	0.298	72771	5502986	Clostridium beijerinckii ATCC 35702	High	PacBio_Metaflye	6007460	0.916025
PacBio_Metaflye_bin.6	100	0	0.6	1369534	2497500	Cutibacterium acnes subsp. defendens ATCC 11828	High	PacBio_Metaflye	2497484	1.00001
PacBio_Metaflye_bin.8	99.57	0.212	0.668	2644562	3234110	Deinococcus radiodurans ATCC 13939	High	PacBio_Metaflye	2644044	1.22317
PacBio_Metaflye_bin.5	99.15	0	0.377	450048	2733217	Enterococcus faecalis TX0309B	High	PacBio_Metaflye	2738556	0.99805
PacBio_Metaflye_bin.2	99.96	0.037	0.507	4642499	4642499	Escherichia coli O157:H7 str. 2011EL-2099	High	PacBio_Metaflye	4642497	1
PacBio_Metaflye_bin.10	99.36	0	0.388	1667903	1667903	Helicobacter pylori	High	PacBio_Metaflye	1667794	1.00007
PacBio_Metaflye_bin.15	98.44	0	0.351	1841921	1841921	Lactobacillus gasseri ATCC 33323 = JCM 1131	High	PacBio_Metaflye	1854273	0.993339
PacBio_Metaflye_bin.12	99.74	0.19	0.514	2241741	2241741	Neisseria meningitidis MC58	High	PacBio_Metaflye	2240102	1.00073
PacBio_Metaflye_bin.1	99.24	0.188	0.422	1539091	5177952	Phocaeicola vulgatus ATCC 8482	High	PacBio_Metaflye	5163177	1.00286
PacBio_Metaflye_bin.7	99.92	0	0.483	709881	2397556	Porphyromonas gingivalis ATCC 33277	High	PacBio_Metaflye	2399479	0.999199
PacBio_Metaflye_bin.9	100	0.454	0.666	6374538	6374538	Pseudomonas aeruginosa	High	PacBio_Metaflye	6374461	1.00001
PacBio_Metaflye_bin.3	96.57	0.802	0.327	140492	2808759	Staphylococcus aureus H43687	High	PacBio_Metaflye	2472647	1.13593
PacBio_Metaflye_bin.17	99.81	0	0.32	2508433	2610262	Staphylococcus epidermidis ATCC 12228	High	PacBio_Metaflye	2503245	1.04275
PacBio_Metaflye_bin.13	99.92	0.177	0.356	643541	2152529	Streptococcus agalactiae 2603V/R	High	PacBio_Metaflye	2159783	0.996641
PacBio_Metaflye_bin.14	100	0	0.368	2031843	2031843	Streptococcus mutans UA159	High	PacBio_Metaflye	2031444	1.0002
PacBio_metaMDBG_bin.1	100	0.273	0.389	4050997	4073896	Acinetobacter baumannii ATCC 17978	High	PacBio_metaMDBG	3902113	1.04402
PacBio_metaMDBG_bin.20	90.24	1.289	0.354	40371	4935963	Bacillus cereus ATCC 10987	High	PacBio_metaMDBG	5235074	0.942864
PacBio_metaMDBG_bin.19	97.07	0.056	0.593	56256	1992528	Bifidobacterium adolescentis ATCC 15703	High	PacBio_metaMDBG	2028350	0.982339
PacBio_metaMDBG_bin.11	99.31	0.151	0.689	3129025	4470672	Cereibacter sphaeroides /Rhodobacter_sphaeroides	High	PacBio_metaMDBG	3146984	1.42062
PacBio_metaMDBG_bin.16	98.87	2.419	0.298	90823	6004612	Clostridium beijerinckii NCIMB 8052	High	PacBio_metaMDBG	6007460	0.999526
PacBio_metaMDBG_bin.7	100	0	0.6	2497492	2497492	Cutibacterium acnes subsp. defendens ATCC 11828	High	PacBio_metaMDBG	2497484	1
PacBio_metaMDBG_bin.10	99.57	0.212	0.668	2644314	3233867	Deinococcus radiodurans ATCC 13939	High	PacBio_metaMDBG	2644044	1.22308
PacBio_metaMDBG_bin.17	99.62	0	0.377	796287	2738739	Enterococcus faecalis TX0309B	High	PacBio_metaMDBG	2738556	1.00007
PacBio_metaMDBG_bin.2	99.96	0.037	0.507	4642511	4644316	Escherichia coli O157:H7 str. 2011EL-2099	High	PacBio_metaMDBG	4642497	1.00039
PacBio_metaMDBG_bin.5	99.36	0	0.388	1667959	1667959	Helicobacter pylori	High	PacBio_metaMDBG	1667794	1.0001
PacBio_metaMDBG_bin.4	98.44	0	0.351	1847590	1847590	Lactobacillus gasseri ATCC 33323 = JCM 1131	High	PacBio_metaMDBG	1854273	0.996396
PacBio_metaMDBG_bin.13	99.74	0.19	0.514	2241713	2241713	Neisseria meningitidis MC58	High	PacBio_metaMDBG	2240102	1.00072
PacBio_metaMDBG_bin.12	99.24	0.566	0.422	4390034	5199146	Phocaeicola vulgatus ATCC 8482	High	PacBio_metaMDBG	5163177	1.00697
PacBio_metaMDBG_bin.8	99.92	0	0.483	1324921	2360325	Porphyromonas gingivalis ATCC 33277	High	PacBio_metaMDBG	2399479	0.983682
PacBio_metaMDBG_bin.6	100	0.4	0.666	6374527	6374527	Pseudomonas aeruginosa	High	PacBio_metaMDBG	6374461	1.00001
PacBio_metaMDBG_bin.9	73.12	0.71	0.654	15910	1776691	Schaalia odontolytica ATCC 17982	Medium	PacBio_metaMDBG	2396044	0.74151
PacBio_metaMDBG_bin.3	98.69	0.642	0.327	403144	2832713	Staphylococcus aureus H43687	High	PacBio_metaMDBG	2472647	1.14562
PacBio_metaMDBG_bin.18	99.81	0	0.319	2504456	2660837	Staphylococcus epidermidis ATCC 12228	High	PacBio_metaMDBG	2503245	1.06296
PacBio_metaMDBG_bin.14	99.92	0.177	0.356	1829329	2155836	Streptococcus agalactiae 2603V/R	High	PacBio_metaMDBG	2159783	0.998173
PacBio_metaMDBG_bin.15	100	0	0.368	2032857	2032857	Streptococcus mutans KK21	High	PacBio_metaMDBG	2031444	1.0007
