# Supplementary material for: Shotgun metagenomics: a deep insight into the composition and function of the complex microbial world
Source: Research Square preprint supplement (doi:10.21203/rs.3.rs-7581938/v1), 2026-01-30
Supplement: Supplementary file 3 [file 76a7e5fdf98302549c1fff77.xlsx]

## Sheet: Sheet1
MAGs/Ref	Leu_trna	Ser_trna	Arg_trna	Gly_trna	Thr_trna	Val_trna	Ala_trna	Pro_trna	Lys_trna	Gln_trna	Glu_trna	Asp_trna	Tyr_trna	Met_trna	Trp_trna	Ile_trna	His_trna	fMet_trna	Cys_trna	Ile2_trna	Asn_trna	Phe_trna	SeC_trna	Tech	Taxa
Acinetobacter_baumannii_ATCC_17978	6	4	6	4	3	4	7	2	2	4	4	3	1	2	3	6	1	3	1	1	4	2	0	REF	Acinetobacter baumannii
PacBio_metaMDBG_bin.1	6	4	6	4	3	4	7	2	2	4	4	3	1	2	3	6	1	3	1	1	4	2	0	PacBio_metaMDBG	Acinetobacter baumannii
PacBio_metaFlye_bin.18	6	4	6	4	3	4	7	2	2	4	4	3	1	2	3	6	1	3	1	1	4	2	0	PacBio_metaFlye	Acinetobacter baumannii
Nanopore_metaMDBG_bin.7	6	5	8	4	3	5	4	0	2	4	1	3	1	2	3	4	0	3	1	1	4	2	0	Nanopore_metaMDBG	Acinetobacter baumannii
Nanopore_metaFlye_bin.8	6	4	6	4	3	4	7	2	2	4	4	3	1	2	3	6	1	3	1	1	4	2	0	Nanopore_metaFlye	Acinetobacter baumannii
Illumina_metaSPAdes_bin.19	6	4	6	4	3	4	1	2	2	4	4	3	1	2	3	0	1	3	1	1	4	2	0	Illumina_metaSPAdes	Acinetobacter baumannii
Illumina_megahit_bin.8	6	4	6	4	3	4	1	2	2	2	4	2	1	2	3	0	1	3	1	1	3	2	0	Illumina_megahit	Acinetobacter baumannii
Bacillus_pacificus_ATCC_10987	8	7	5	9	6	7	6	4	6	5	7	6	3	2	2	4	2	4	1	2	5	4	0	REF	Bacillus cereus group
PacBio_metaMDBG_bin.20	3	6	3	6	5	5	3	2	4	3	5	3	1	2	1	3	1	2	0	2	4	2	0	PacBio_metaMDBG	Bacillus cereus group
Nanopore_metaMDBG_bin.22	1	4	0	4	2	2	0	0	1	2	3	2	1	2	1	1	1	2	1	2	2	2	0	Nanopore_metaMDBG	Bacillus cereus group
Nanopore_metaFlye_bin.2	7	7	4	8	6	7	5	3	5	5	7	6	3	2	2	3	2	4	1	2	5	4	0	Nanopore_metaFlye	Bacillus cereus group
Illumina_metaSPAdes_bin.8	6	7	4	8	5	6	3	3	4	5	6	5	3	2	2	2	2	4	1	2	5	3	0	Illumina_metaSPAdes	Bacillus cereus group
Illumina_megahit_bin.10	3	5	2	6	2	2	2	1	3	3	5	5	1	1	1	1	1	2	1	1	4	3	0	Illumina_megahit	Bacillus cereus group
Bifidobacterium_adolescentis_ATCC_15703	5	4	5	5	3	5	4	3	2	2	2	2	1	1	1	2	1	1	1	0	3	1	0	REF	Bifidobacterium adolescentis
PacBio_metaMDBG_bin.19	5	3	5	5	3	5	3	3	2	2	2	2	1	1	1	2	1	1	1	0	3	1	0	PacBio_metaMDBG	Bifidobacterium adolescentis
PacBio_metaFlye_bin.4	2	3	3	3	1	0	3	0	1	2	1	0	1	1	0	2	0	1	0	0	1	0	0	PacBio_metaFlye	Bifidobacterium adolescentis
Nanopore_metaFlye_bin.9	5	4	5	5	3	5	4	3	2	2	2	2	1	1	1	3	1	1	1	0	3	1	0	Nanopore_metaFlye	Bifidobacterium adolescentis
Illumina_metaSPAdes_bin.16	5	4	5	5	3	5	4	3	2	2	2	2	1	1	1	2	1	1	1	0	3	1	0	Illumina_metaSPAdes	Bifidobacterium adolescentis
Illumina_megahit_bin.18	5	4	5	5	3	5	4	3	2	2	2	2	1	1	1	2	1	1	1	0	3	1	0	Illumina_megahit	Bifidobacterium adolescentis
Rhodobacter_sphaeroides_ATCC_17029	7	4	4	4	3	3	6	3	1	1	2	2	1	1	2	4	1	4	1	1	1	1	0	REF	Cereibacter sphaeroides
PacBio_metaMDBG_bin.11	7	4	4	4	3	3	6	3	1	1	2	2	1	1	1	4	1	4	1	1	1	1	0	PacBio_metaMDBG	Cereibacter sphaeroides
PacBio_metaFlye_bin.11	7	4	4	4	3	3	6	3	1	1	2	2	1	1	1	4	1	4	1	1	1	1	0	PacBio_metaFlye	Cereibacter sphaeroides
Nanopore_metaMDBG_bin.13	7	4	4	5	3	3	3	3	2	2	2	2	1	1	1	1	1	1	1	0	1	1	0	Nanopore_metaMDBG	Cereibacter sphaeroides
Nanopore_metaFlye_bin.16	7	4	4	4	3	3	6	3	1	1	2	2	1	1	1	4	1	4	1	1	1	1	0	Nanopore_metaFlye	Cereibacter sphaeroides
Illumina_metaSPAdes_bin.13	7	4	4	4	3	3	2	3	1	1	2	2	1	1	1	0	1	2	1	1	1	1	0	Illumina_metaSPAdes	Cereibacter sphaeroides
Illumina_megahit_bin.1	7	4	4	4	3	3	3	3	1	1	2	1	1	1	1	1	1	3	1	1	1	1	0	Illumina_megahit	Cereibacter sphaeroides
Clostridium_beijerinckii_ATCC_35702	9	6	6	8	6	5	4	3	7	3	5	4	3	2	2	3	3	4	1	2	6	3	0	REF	Clostridium beijerinckii
PacBio_metaMDBG_bin.16	9	6	6	8	6	5	3	3	7	3	5	4	3	2	2	3	3	4	1	1	6	3	0	PacBio_metaMDBG	Clostridium beijerinckii
PacBio_metaFlye_bin.16	9	6	5	8	5	4	4	3	5	3	5	4	1	2	2	2	3	4	1	2	5	3	0	PacBio_metaFlye	Clostridium beijerinckii
Nanopore_metaMDBG_bin.9	8	6	5	7	7	7	1	3	4	3	6	5	3	2	2	2	2	5	1	0	4	2	0	Nanopore_metaMDBG	Clostridium beijerinckii
Nanopore_metaFlye_bin.6	9	6	6	8	6	5	4	3	7	3	5	4	3	2	2	3	3	4	1	2	6	3	0	Nanopore_metaFlye	Clostridium beijerinckii
Illumina_metaSPAdes_bin.1	8	6	6	8	5	4	2	3	7	3	5	4	3	1	2	1	3	3	1	1	4	3	0	Illumina_metaSPAdes	Clostridium beijerinckii
Illumina_megahit_bin.17	5	6	6	5	3	2	2	3	4	2	3	2	2	0	2	1	3	1	1	0	5	2	0	Illumina_megahit	Clostridium beijerinckii
Cutibacterium_acnes_ATCC_11828	5	4	4	3	3	3	3	3	2	2	2	1	1	1	1	1	1	1	1	1	1	1	0	REF	Cutibacterium acnes
PacBio_metaMDBG_bin.7	5	4	4	3	3	3	3	3	2	2	2	1	1	1	1	1	1	1	1	1	1	1	0	PacBio_metaMDBG	Cutibacterium acnes
PacBio_metaFlye_bin.6	5	4	4	3	3	3	3	3	2	2	2	1	1	1	1	1	1	1	1	1	1	1	0	PacBio_metaFlye	Cutibacterium acnes
Nanopore_metaMDBG_bin.11	5	4	4	3	3	3	3	3	2	2	2	1	1	1	1	1	1	1	1	1	1	1	0	Nanopore_metaMDBG	Cutibacterium acnes
Nanopore_metaFlye_bin.1	5	4	4	3	3	3	3	3	2	2	2	1	1	1	1	1	1	1	1	1	1	1	0	Nanopore_metaFlye	Cutibacterium acnes
Illumina_metaSPAdes_bin.3	5	4	4	3	3	3	3	3	2	2	2	1	1	1	1	1	1	1	1	1	1	1	0	Illumina_metaSPAdes	Cutibacterium acnes
Illumina_megahit_bin.14	5	4	4	3	3	3	3	3	2	2	2	1	1	1	1	1	1	1	1	1	1	1	0	Illumina_megahit	Cutibacterium acnes
Deinococcus_radiodurans_ATCC_BAA_816	5	4	5	5	3	3	3	3	2	2	1	3	2	1	1	1	1	1	1	1	1	1	0	REF	Deinococcus radiodurans
PacBio_metaMDBG_bin.10	5	4	5	5	3	3	3	3	2	2	1	3	2	1	1	1	1	1	1	1	1	1	0	PacBio_metaMDBG	Deinococcus radiodurans
PacBio_metaFlye_bin.8	5	4	5	5	3	3	3	3	2	2	1	3	2	1	1	1	1	1	1	1	1	1	0	PacBio_metaFlye	Deinococcus radiodurans
Nanopore_metaMDBG_bin.1	6	6	4	4	2	4	3	4	2	2	2	2	1	1	1	0	2	1	1	2	1	1	0	Nanopore_metaMDBG	Deinococcus radiodurans
Nanopore_metaFlye_bin.15	5	4	5	5	3	3	3	3	2	2	1	3	2	1	1	1	1	1	1	1	1	1	0	Nanopore_metaFlye	Deinococcus radiodurans
Illumina_metaSPAdes_bin.18	5	4	5	5	3	3	3	3	2	2	1	3	2	1	1	1	1	1	1	1	1	1	0	Illumina_metaSPAdes	Deinococcus radiodurans
Illumina_megahit_bin.3	5	4	4	5	3	3	3	3	2	2	1	3	2	1	1	1	1	1	1	1	1	1	0	Illumina_megahit	Deinococcus radiodurans
Enterococcus_faecalis_ATCC_47077	6	5	5	4	4	3	3	2	3	2	3	3	2	1	1	2	1	2	1	1	2	2	0	REF	Enterococcus faecalis
PacBio_metaMDBG_bin.17	6	5	5	4	4	3	3	2	3	2	3	3	2	1	1	2	1	2	1	1	2	2	0	PacBio_metaMDBG	Enterococcus faecalis
PacBio_metaFlye_bin.5	6	5	5	4	4	3	3	2	3	2	3	3	2	1	1	2	1	2	1	1	2	2	0	PacBio_metaFlye	Enterococcus faecalis
Nanopore_metaMDBG_bin.5	4	3	4	3	2	1	2	2	2	1	2	2	1	1	0	2	0	2	0	1	0	1	0	Nanopore_metaMDBG	Enterococcus faecalis
Nanopore_metaFlye_bin.10	6	5	5	4	4	3	4	2	3	2	3	3	2	1	1	2	1	2	1	1	2	2	0	Nanopore_metaFlye	Enterococcus faecalis
Illumina_metaSPAdes_bin.2	2	5	5	2	2	1	1	2	1	2	3	3	2	1	1	2	1	2	1	1	2	2	0	Illumina_metaSPAdes	Enterococcus faecalis
Illumina_megahit_bin.13	1	1	4	0	2	0	0	1	1	1	1	0	1	0	0	0	0	0	0	0	1	0	0	Illumina_megahit	Enterococcus faecalis
Escherichia_coli_ATCC_700926	8	5	7	6	5	7	5	3	6	4	4	3	3	2	1	3	1	4	1	2	4	2	1	REF	Escherichia coli
PacBio_metaMDBG_bin.2	8	5	7	6	5	7	5	3	6	4	4	3	3	2	1	3	1	4	1	2	4	2	1	PacBio_metaMDBG	Escherichia coli
PacBio_metaFlye_bin.2	8	5	7	6	5	7	5	3	6	4	4	3	3	2	1	3	1	4	1	2	4	2	1	PacBio_metaFlye	Escherichia coli
Nanopore_metaMDBG_bin.31	8	5	7	6	5	7	5	3	6	4	4	3	3	2	1	3	1	4	1	2	4	2	1	Nanopore_metaMDBG	Escherichia coli
Nanopore_metaFlye_bin.17	8	5	7	6	5	7	5	3	6	4	4	3	3	2	1	3	1	4	1	2	4	2	1	Nanopore_metaFlye	Escherichia coli
Illumina_metaSPAdes_bin.10	8	5	7	6	5	7	2	3	6	4	0	3	3	2	1	0	1	4	1	2	4	2	1	Illumina_metaSPAdes	Escherichia coli
Illumina_megahit_bin.19	8	5	7	6	5	4	2	3	4	2	0	3	3	2	1	0	1	4	1	2	4	2	1	Illumina_megahit	Escherichia coli
Helicobacter_pylori_ATCC_700392	4	3	4	2	2	2	2	2	1	1	2	1	1	1	1	1	1	1	1	1	1	1	0	REF	Helicobacter pylori
PacBio_metaMDBG_bin.5	4	3	4	2	2	2	2	2	1	1	2	1	1	1	1	1	1	1	1	1	1	1	0	PacBio_metaMDBG	Helicobacter pylori
PacBio_metaFlye_bin.10	4	3	4	2	2	2	2	2	1	1	2	1	1	1	1	1	1	1	1	1	1	1	0	PacBio_metaFlye	Helicobacter pylori
Nanopore_metaMDBG_bin.33	5	4	4	3	2	2	2	2	1	1	2	1	1	1	1	1	1	1	2	0	1	2	0	Nanopore_metaMDBG	Helicobacter pylori
Nanopore_metaFlye_bin.4	4	3	4	2	2	2	2	2	1	1	2	1	1	1	1	1	1	1	1	1	1	1	0	Nanopore_metaFlye	Helicobacter pylori
Illumina_metaSPAdes_bin.7	4	3	4	2	2	2	2	2	1	1	2	1	1	1	1	1	1	1	1	1	1	1	0	Illumina_metaSPAdes	Helicobacter pylori
Illumina_megahit_bin.9	4	3	4	2	2	2	2	2	1	1	2	1	1	1	1	1	1	1	1	1	1	1	0	Illumina_megahit	Helicobacter pylori
PacBio_metaMDBG_bin.4	5	4	3	4	5	2	2	2	3	5	3	2	2	1	1	3	1	2	1	1	4	2	0	PacBio_metaMDBG	Lactobacillus gasseri
PacBio_metaFlye_bin.15	5	4	3	4	5	2	1	2	3	5	3	2	2	1	1	2	1	2	1	1	3	2	0	PacBio_metaFlye	Lactobacillus gasseri
Nanopore_metaMDBG_bin.32	2	2	1	2	4	0	1	1	2	4	2	1	2	0	1	0	1	1	1	0	0	1	0	Nanopore_metaMDBG	Lactobacillus gasseri
Nanopore_metaFlye_bin.12	6	5	3	4	5	3	2	3	3	5	4	2	2	2	1	3	1	3	1	2	4	2	0	Nanopore_metaFlye	Lactobacillus gasseri
Lactobacillus_gasseri_ATCC_33323	7	5	4	6	6	3	2	3	4	5	3	3	2	2	1	4	1	3	1	2	4	3	0	Lactobacillus_gasseri	Lactobacillus gasseri
Illumina_metaSPAdes_bin.20	2	2	2	0	1	1	0	0	0	5	2	0	1	0	0	0	0	0	0	0	1	0	0	Illumina_metaSPAdes	Lactobacillus gasseri
Illumina_megahit_bin.4	0	2	2	2	3	1	0	1	2	1	1	0	0	0	0	0	0	0	0	0	2	0	0	Illumina_megahit	Lactobacillus gasseri
Neisseria_meningitidis_ATCC_BAA_335	6	4	5	5	4	3	5	3	2	3	3	2	1	1	1	4	1	1	1	1	2	1	0	REF	Neisseria meningitidis
PacBio_metaMDBG_bin.13	6	4	5	5	4	3	5	3	2	3	3	2	1	1	1	4	1	1	1	1	2	1	0	PacBio_metaMDBG	Neisseria meningitidis
PacBio_metaFlye_bin.12	6	4	5	5	4	3	5	3	2	3	3	2	1	1	1	4	1	1	1	1	2	1	0	PacBio_metaFlye	Neisseria meningitidis
Nanopore_metaMDBG_bin.8	6	4	4	5	4	3	3	2	1	3	3	2	1	1	1	2	0	0	1	1	2	1	0	Nanopore_metaMDBG	Neisseria meningitidis
Nanopore_metaFlye_bin.5	6	4	5	5	4	3	5	3	2	3	3	2	1	1	1	4	1	1	1	1	2	1	0	Nanopore_metaFlye	Neisseria meningitidis
Illumina_metaSPAdes_bin.11	6	4	5	5	4	3	1	3	2	3	3	2	1	1	1	0	1	1	1	1	2	1	0	Illumina_metaSPAdes	Neisseria meningitidis
Illumina_megahit_bin.5	5	4	6	5	4	2	1	3	2	3	2	0	1	1	1	0	1	1	1	1	2	1	0	Illumina_megahit	Neisseria meningitidis
Phocaeicola_vulgatus_ATCC_8482	6	5	7	9	5	3	8	3	5	2	3	4	2	2	2	7	1	1	1	1	2	2	0	REF	Phocaeicola vulgatus
PacBio_metaMDBG_bin.12	6	5	6	9	5	3	8	3	5	2	3	4	2	2	2	7	1	1	1	1	2	2	0	PacBio_metaMDBG	Phocaeicola vulgatus
PacBio_metaFlye_bin.1	6	5	6	9	5	3	8	3	5	2	3	4	2	2	2	7	1	1	1	1	2	2	0	PacBio_metaFlye	Phocaeicola vulgatus
Nanopore_metaMDBG_bin.16	1	4	5	6	5	0	3	2	2	2	2	3	2	2	2	2	0	0	0	1	2	2	0	Nanopore_metaMDBG	Phocaeicola vulgatus
Nanopore_metaFlye_bin.18	6	5	6	9	5	3	7	3	5	2	3	4	2	2	2	6	1	1	1	1	2	3	0	Nanopore_metaFlye	Phocaeicola vulgatus
Illumina_metaSPAdes_bin.21	6	6	7	9	5	3	1	3	5	2	3	4	2	2	2	0	1	1	1	1	2	2	0	Illumina_metaSPAdes	Phocaeicola vulgatus
Illumina_megahit_bin.7	4	6	6	7	6	5	1	3	6	3	4	4	3	2	2	0	1	1	1	1	3	2	0	Illumina_megahit	Phocaeicola vulgatus
Porphyromonas_gingivalis_ATCC_33277	5	3	5	4	3	2	5	3	2	2	2	2	2	1	1	4	1	1	1	1	2	1	0	REF	Porphyromonas gingivalis
PacBio_metaMDBG_bin.8	5	4	5	4	3	2	5	3	2	2	2	2	2	1	1	4	1	1	1	1	2	1	0	PacBio_metaMDBG	Porphyromonas gingivalis
PacBio_metaFlye_bin.7	5	3	5	4	3	2	5	3	2	2	2	2	2	1	1	4	1	1	1	1	2	1	0	PacBio_metaFlye	Porphyromonas gingivalis
Nanopore_metaFlye_bin.3	6	3	6	6	5	2	5	4	2	2	2	2	2	1	1	5	1	2	1	1	2	2	0	Nanopore_metaFlye	Porphyromonas gingivalis
Illumina_metaSPAdes_bin.15	5	2	5	4	3	2	1	3	2	2	2	0	2	1	1	0	1	1	1	1	2	1	0	Illumina_metaSPAdes	Porphyromonas gingivalis
Illumina_megahit_bin.16	5	2	5	4	3	0	1	3	2	2	2	2	2	1	1	0	1	1	1	1	2	1	0	Illumina_megahit	Porphyromonas gingivalis
Pseudomonas_aeruginosa_ATCC_9027	7	4	6	5	3	3	6	3	3	1	3	4	1	1	1	4	2	2	1	1	2	2	1	REF	Pseudomonas aeruginosa
PacBio_metaMDBG_bin.6	7	4	6	5	3	3	6	3	3	1	3	4	1	1	1	4	2	2	1	1	2	2	1	PacBio_metaMDBG	Pseudomonas aeruginosa
PacBio_metaFlye_bin.9	7	4	6	5	3	3	6	3	3	1	3	4	1	1	1	4	2	2	1	1	2	2	1	PacBio_metaFlye	Pseudomonas aeruginosa
Nanopore_metaMDBG_bin.29	6	3	5	4	2	3	2	3	1	1	3	4	0	1	0	0	2	2	0	0	2	2	1	Nanopore_metaMDBG	Pseudomonas aeruginosa
Nanopore_metaFlye_bin.7	7	4	6	5	3	3	6	3	3	1	3	4	1	1	1	4	2	2	1	1	2	2	1	Nanopore_metaFlye	Pseudomonas aeruginosa
Illumina_metaSPAdes_bin.6	7	4	6	5	3	3	2	3	3	1	3	4	1	1	1	0	2	2	1	1	2	2	1	Illumina_metaSPAdes	Pseudomonas aeruginosa
Illumina_megahit_bin.11	7	4	6	3	2	3	3	3	3	1	3	4	0	1	0	1	2	2	1	1	2	2	1	Illumina_megahit	Pseudomonas aeruginosa
Schaalia_odontolytica_ATCC_17982	5	4	4	4	3	3	3	3	3	2	3	1	1	1	1	1	1	1	1	1	1	1	0	REF	Schaalia odontolytica
PacBio_metaMDBG_bin.9	3	1	3	4	2	3	2	2	3	1	3	1	1	1	1	0	1	1	1	1	1	1	0	PacBio_metaMDBG	Schaalia odontolytica
Nanopore_metaMDBG_bin.24	6	3	2	0	2	0	2	2	3	2	2	0	1	1	1	0	0	1	0	1	1	0	0	Nanopore_metaMDBG	Schaalia odontolytica
Nanopore_metaFlye_bin.11	5	4	4	4	3	3	3	3	3	2	3	1	1	1	1	1	1	1	1	1	1	1	0	Nanopore_metaFlye	Schaalia odontolytica
Illumina_metaSPAdes_bin.12	5	4	4	4	3	3	3	3	3	2	3	1	1	1	1	1	1	1	1	1	1	1	0	Illumina_metaSPAdes	Schaalia odontolytica
Illumina_megahit_bin.6	5	4	4	4	3	3	3	3	3	2	2	1	1	1	1	1	1	1	1	1	1	1	0	Illumina_megahit	Schaalia odontolytica
Staphylococcus_aureus_subsp_aureus_ATCC_BAA_1556	5	5	4	7	3	3	3	2	3	2	3	4	2	1	1	2	2	2	1	1	3	2	0	REF	Staphylococcus aureus
PacBio_metaMDBG_bin.3	4	5	3	6	2	2	2	1	2	2	3	4	2	1	1	1	2	2	1	1	3	2	0	PacBio_metaMDBG	Staphylococcus aureus
PacBio_metaFlye_bin.3	4	5	3	6	2	2	2	1	2	2	3	4	2	1	1	1	2	2	1	1	3	2	0	PacBio_metaFlye	Staphylococcus aureus
Illumina_metaSPAdes_bin.5	1	0	1	1	0	0	0	0	0	0	0	0	0	0	0	0	0	0	0	0	0	0	0	Illumina_metaSPAdes	Staphylococcus aureus
Illumina_megahit_bin.2	2	2	3	2	1	1	1	1	1	0	1	2	0	0	0	0	0	1	0	0	1	1	0	Illumina_megahit	Staphylococcus aureus
Staphylococcus_epidermidis_ATCC_12228	5	5	4	7	4	3	3	2	3	2	3	3	2	1	1	2	2	2	1	1	3	2	0	REF	Staphylococcus epidermidis
PacBio_metaMDBG_bin.18	5	5	4	7	4	3	3	2	3	2	3	3	2	1	1	2	2	2	1	1	3	2	0	PacBio_metaMDBG	Staphylococcus epidermidis
PacBio_metaFlye_bin.17	5	5	4	7	4	3	3	2	3	2	3	3	2	1	1	2	2	2	1	1	3	2	0	PacBio_metaFlye	Staphylococcus epidermidis
Nanopore_metaMDBG_bin.12	0	1	2	0	1	1	0	0	1	1	2	1	1	0	0	0	0	0	0	0	2	0	0	Nanopore_metaMDBG	Staphylococcus epidermidis
Illumina_metaSPAdes_bin.14	1	1	1	1	1	1	0	0	1	1	1	0	1	0	0	0	0	0	0	0	2	0	0	Illumina_metaSPAdes	Staphylococcus epidermidis
Streptococcus_agalactiae_ATCC_BAA_611	8	5	5	5	4	5	7	2	4	4	5	3	3	1	2	4	2	3	1	1	3	3	0	REF	Streptococcus agalactiae
PacBio_metaMDBG_bin.14	8	5	5	5	4	4	7	2	4	4	5	3	3	1	2	4	2	3	1	1	3	3	0	PacBio_metaMDBG	Streptococcus agalactiae
PacBio_metaFlye_bin.13	9	5	5	4	5	4	6	1	5	4	5	4	3	1	2	4	2	3	1	1	3	3	0	PacBio_metaFlye	Streptococcus agalactiae
Nanopore_metaMDBG_bin.34	2	2	3	2	1	2	2	0	1	2	3	0	2	0	1	2	1	1	0	0	1	1	0	Nanopore_metaMDBG	Streptococcus agalactiae
Nanopore_metaFlye_bin.13	8	5	5	4	4	4	5	2	4	4	4	3	3	1	2	3	2	3	1	1	2	3	0	Nanopore_metaFlye	Streptococcus agalactiae
Illumina_metaSPAdes_bin.4	4	3	3	3	2	2	0	1	2	1	3	1	0	1	0	2	0	1	1	1	1	1	0	Illumina_metaSPAdes	Streptococcus agalactiae
Streptococcus_mutans_ATCC_700610	8	5	5	5	5	4	5	2	4	2	2	3	2	1	1	2	1	2	1	1	2	2	0	REF	Streptococcus mutans
PacBio_metaMDBG_bin.15	8	5	5	5	5	4	5	2	4	2	2	3	2	1	1	2	1	2	1	1	2	2	0	PacBio_metaMDBG	Streptococcus mutans
PacBio_metaFlye_bin.14	8	5	5	5	5	4	5	2	4	2	2	3	2	1	1	2	1	2	1	1	2	2	0	PacBio_metaFlye	Streptococcus mutans
Nanopore_metaMDBG_bin.26	3	3	2	1	1	0	2	0	0	2	1	0	2	0	1	1	1	1	1	0	2	1	0	Nanopore_metaMDBG	Streptococcus mutans
Nanopore_metaFlye_bin.14	7	5	5	4	3	3	4	2	3	2	2	2	2	1	1	2	1	2	1	1	2	2	0	Nanopore_metaFlye	Streptococcus mutans
Illumina_metaSPAdes_bin.17	3	5	3	3	2	1	0	2	1	1	2	0	1	1	1	2	1	2	1	1	2	2	0	Illumina_metaSPAdes	Streptococcus mutans
Illumina_megahit_bin.15	3	3	4	1	3	0	0	1	1	2	1	0	2	0	1	1	1	0	1	0	2	1	0	Illumina_megahit	Streptococcus mutans
