# Supplementary material for: Shotgun metagenomics: a deep insight into the composition and function of the complex microbial world
Source: Research Square preprint supplement (doi:10.21203/rs.3.rs-7581938/v1), 2026-01-30
Supplement: Supplementary file 4 [file 7d529945e7c428de56786804.docx]

**Supplementary Figure S1: Genomic profile of the commercial mock microbial community (MSA-1002TM, ATCC) obtained from Femto Pulse System with Genomic DNA 165 kb Kit.** (**A**) The Femto Pulse measurement of No-fragmented mock genomes showed a smear from 1 kbp to 2Mbp. (**B**) Femto Pulse profile of mock genomes after shearing by using Megaruptor®3 displayed 99% of the fragments between 1-30 kb, with a peak of about 12 kbp.

**Supplementary Figure S2: MASH distances between obtained MAGs and corresponding reference genome.** MASH-based 15,000 sketches of MAGs and corresponding reference genome were compared to infer an approximation of the ANI (Average Nucleotide Index) distance. For each reference genome, the observed distances to the obtained MAGs were shown as a scatterplot. The combination of sequencing technique and assembly methods and the observed MASH distance as percentage were shown on the x and y axis, respectively. The dots are coloured according to the quality of the MAGs.

**Supplementary Figure S3: Relative Abundances of Mock community species.** The relative species abundances in mock mixture and estimated in MAGs are shown as stacked barplots.

**Supplementary Table S1: Taxonomic composition and genomic characteristics of the Mock ATCC 20 Strain Even Mix (MSA-1002TM, ATCC®, USA).** Per each strain, the species scientific name and the genome size and the estimated relative abundance are listed. The last version of the Product Sheet was available on the ATCC website in 2022.

**Supplementary Table S2: Mapping results for Illumina, Nanopore and PacBio reads against mock reference genomes.** Each row represents a contig belonging to its reference genome. This table reports number of mapped reads (*n. reads*), covered bases (*cov. bases*), coverage percentages (*coverage*), mean depth *(meandepth*), mean base quality *(meanbaseq*), mean map quality (*meanmapq*), Read Per Kilobase per Milion (RPKM).

**Supplementary Table S3: Mapping results for Illumina, Nanopore and PacBio contigs obtained by related meta-assemblers against mock reference genomes.** Each row represents a reference genome. For each combination of sequencing technology and meta-assembler, this table reports the number of mapped contigs (*Fragments*) and the covered bases percentage (*Coverage*).

**Supplementary Table S4:** **Results of kMetaShot classification of each MAG**. The dereplication results of MAGs and reference genomes obtained using dRep are also reported in the columns named *primary_cluster, secondary_cluster and Representative Genome.*

**Supplementary Table S5:** **Quality check of MAGs.** Completeness and contamination percentages for each bin/MAG, assessed with CheckM, are reported. Also, MAG-specific N50 and GC% are also computed. Furthermore, total length of each MAG is compared with the length of the expected genome relying on kMetaShot classification and expressed in percentage in the last column (*% covered*).

**Supplementary Table S6: Number of aminoacidic specific tRNA genes annotated for MAG and reference genomes (in red).**
