# Supplementary material for: Shotgun metagenomics: a deep insight into the composition and function of the complex microbial world
Source: Research Square preprint supplement (doi:10.21203/rs.3.rs-7581938/v1), 2026-01-30
Supplement: Supplementary file 5 [file b65e990b82686b9fdd940a89.xlsx]

## Sheet: Sheet1
Species	Genome size (bp)	Relative Abundance (%)
Acinetobacter baumannii (ATCC 17978)	4,075,779	3.48555
Bacillus pacificus (ATCC 10987)	5,442,819	2.6101
Bacteroides vulgatus (ATCC 8482)	5,163,177	2.75147
Bifidobacterium adolescentis (ATCC 15703)	2,089,630	6.79848
Clostridium beijerinckii (ATCC 35702)	6,007,460	2.36478
Cutibacterium acnes (ATCC 11828)	2,497,484	5.68825
Deinococcus radiodurans (ATCC BAA-816)	3,280,465	4.33058
Enterococcus faecalis (ATCC 47077)	2,738,556	5.18752
Escherichia coli (ATCC 700926)	4,642,497	3.06006
Helicobacter pylori (ATCC 700392)	1,667,794	8.51803
Lactobacillus gasseri (ATCC 33323)	1,854,273	7.66139
Neisseria meningitidis (ATCC BAA-335)	2,240,102	6.34182
Porphyromonas gingivalis (ATCC 33277)	2,399,479	5.92058
Pseudomonas aeruginosa (ATCC 9027)	6,374,461	2.22863
Rhodobacter sphaeroides (ATCC 17029)	4,488,518	3.16503
Schaalia odontolytica (ATCC 17982)	2,396,044	5.92907
Staphylococcus aureus (ATCC BAA-1556)	2,915,427	4.87281
Staphylococcus epidermidis (ATCC 12228)	2,575,951	5.51498
Streptococcus agalactiae (ATCC BAA-611)	2,159,783	6.57766
Streptococcus mutans (ATCC 700610)	2,031,444	6.99321
