# Supplementary material for: Shotgun metagenomics: a deep insight into the composition and function of the complex microbial world
Source: Research Square preprint supplement (doi:10.21203/rs.3.rs-7581938/v1), 2026-01-30
Supplement: Supplementary file 6 [file c8df0f80005da3d7d641a06a.xlsx]

## Sheet: Assembly
	Illumina Data				Nanopore Data				PacBio Data
	megaHIT		metaSPADES		metaMDBG		metaFlye		metaFlye		metaMDBG
Ref Genome	Fragments	Coverage	Fragments	Coverage	Fragments	Coverage	Fragments	Coverage	Fragments	Coverage	Fragments	Coverage
Acinetobacter_baumannii_ATCC_17978	40	98.752	29	98.847	127	99.303	5	100	6	100	3	99.778
Bacillus_pacificus_ATCC_10987	50	98.471	44	98.567	1044	96.404	19	99.473	102	48.864	213	92.519
Bifidobacterium_adolescentis_ATCC_15703	15	98.604	11	98.736	327	96.407	10	99.881	42	60.084	50	95.654
Clostridium_beijerinckii_ATCC_35702	95	98.072	63	98.36	270	99.315	1	99.994	106	90.68	105	97.622
Cutibacterium_acnes_ATCC_11828	10	99.427	10	99.416	83	99.45	2	100	2	99.999	1	100
Deinococcus_radiodurans_ATCC_BAA_816	47	98.82	49	98.841	236	97.944	6	99.799	5	99.958	4	99.958
Enterococcus_faecalis_ATCC_47077	21	99.126	18	99.279	273	97.829	6	99.879	9	99.609	4	99.967
Escherichia_coli_ATCC_700926	79	98.457	76	98.48	273	100	1	100	2	100	1	100
Helicobacter_pylori_ATCC_700392	43	97.64	44	97.984	273	99.625	1	99.998	1	100	1	100
Lactobacillus_gasseri_ATCC_33323	13	98.294	14	98.536	273	99.181	2	100	2	99.338	1	99.64
Neisseria_meningitidis_ATCC_BAA_335	167	94.755	78	96.591	273	99.416	2	99.953	2	99.953	1	99.952
Phocaeicola_vulgatus_ATCC_8482	112	96.733	108	97.244	273	96.7	11	98.433	10	99.494	3	99.558
Porphyromonas_gingivalis_ATCC_33277	104	92.574	89	93.246	273	95.935	7	98.214	7	98.057	4	97.455
Pseudomonas_aeruginosa_ATCC_9027	50	99.336	27	99.548	273	99.283	1	99.999	2	100	1	100
Rhodobacter_sphaeroides_ATCC_17029	30	98.922	31	98.96	273	99.36	3	99.584	4	99.584	3	99.583
Schaalia_odontolytica_ATCC_17982	28	99.016	19	99.279	273	97.934	3	99.983	28	14.208	151	76.664
Staphylococcus_aureus_subsp_aureus_ATCC_BAA_1556	60	98.218	36	98.724	273	99.291	4	99.983	28	97.292	25	98.464
Staphylococcus_epidermidis_ATCC_12228	73	97.756	68	98.13	273	99.775	10	99.927	9	99.897	8	100
Streptococcus_agalactiae_ATCC_BAA_611	41	97.418	38	97.629	273	95.356	12	99.35	6	99.594	2	99.603
Streptococcus_mutans_ATCC_700610	29	98.231	25	98.457	273	95.527	5	99.572	2	99.19	1	100
not_aligned	44		96		15		3				1
