# Supplementary material for: Shotgun metagenomics: a deep insight into the composition and function of the complex microbial world
Source: Research Square preprint supplement (doi:10.21203/rs.3.rs-7581938/v1), 2026-01-30
Supplement: Supplementary file 7 [file f8befb306fb9b91ddc9a3950.xlsx]

## Sheet: Ref Genomes Coverage
			Illumina								Nanopore								PacBio
Species	Contig	Length	n. reads	cov. bases	coverage	meandepth	meanbaseq	meanmapq	RPKM	% RPKM	n. reads	cov. bases	coverage	meandepth	meanbaseq	meanmapq	RPKM	% RPKM	n. reads	cov. bases	coverage	meandepth	meanbaseq	meanmapq	RPKM	% RPKM
Acinetobacter_baumannii_ATCC_17978	071a82bb90b94c6f_1	3902113	14716756	3902113	100	534.692	35.1	57.8	17.54	0.0377682	18628	3902104	99.9998	23.2971	29.1	58.6	2.30146	0.00940481	8253	3902037	99.9981	18.8134	87.3	59.8	18.7845	0.0762747
Acinetobacter_baumannii_ATCC_17978	071a82bb90b94c6f_2	148955	553849	148955	100	526.993	35.1	53.3	17.2923		731	148955	100	19.7448	26	54.9	0.0903139		289	148954	99.9993	16.484	87.5	58.3	0.657789
Acinetobacter_baumannii_ATCC_17978	071a82bb90b94c6f_3	13409	36818	13409	100	391.147	35	58.8	12.7697		56	13409	100	5.76061	25.8	58.8	0.00691871		12	13409	100	4.7398	88.5	60	0.027313
Acinetobacter_baumannii_ATCC_17978	071a82bb90b94c6f_4	11302	80216	11302	100	1010.08	35	58.7	33.0082		93	11302	100	16.9737	24.6	57.5	0.01149		34	11302	100	13.5265	89	60	0.0773869
Bacillus_pacificus_ATCC_10987	5371a9904eb64361_1	5235074	11953087	5235074	100	303.213	35.2	55.9	10.6188	0.0420998	1246371	5235074	100	138.462	29.5	57.4	153.987	0.63422	6500	5171517	98.7859	4.40876	89.5	59.5	14.7946	0.0602879
Bacillus_pacificus_ATCC_10987	5371a9904eb64361_2	147664	439457	147664	100	394.127	35.2	53.9	13.8407		48706	147664	100	184.892	27.3	55.4	6.01755		189	146083	98.9293	4.49521	89.4	58.4	0.43018
Bacillus_pacificus_ATCC_10987	5371a9904eb64361_3	33603	99651	33603	100	390.63	35.2	56.6	13.7918		11583	33603	100	188.763	28.1	58	1.43106		50	33603	100	4.75922	85.6	60	0.113804
Bacillus_pacificus_ATCC_10987	5371a9904eb64361_4	19072	57703	19072	100	398.698	35.2	56.6	14.0708		6576	19072	100	190.834	29.2	58.2	0.812455		31	19072	100	5.33898	92.4	60	0.0705587
Bacillus_pacificus_ATCC_10987	5371a9904eb64361_5	3582	10843	3582	100	391.367	35.2	55.8	14.078		1322	3582	100	172.564	26.7	57.4	0.163331		11	3582	100	2.99916	89.2	60	0.025037
Bacillus_pacificus_ATCC_10987	5371a9904eb64361_6	2377	5700	2377	100	311.136	35.3	0.55	11.1522		621	2377	100	118.44	24.6	0.615	0.0767236		5	1855	78.0395	1.49684	92.3	0	0.0113804
Bacillus_pacificus_ATCC_10987	5371a9904eb64361_7	1447	3828	1447	100	335.601	35.2	0.539	12.3032		356	1447	100	106.131	27.3	1.37	0.0439833		2	1447	100	1.99032	78.4	0	0.00455217
Bifidobacterium_adolescentis_ATCC_15703	c45a1c57adf4460e_1	2028350	5621047	2028350	100	387.655	35.5	57.5	12.8882	0.0116438	56364	2028350	100	30.4941	28.6	57.5	6.96369	0.0280042	2058	2010401	99.1151	4.32615	88.5	59.8	4.68419	0.0187756
Bifidobacterium_adolescentis_ATCC_15703	c45a1c57adf4460e_2	61280	157640	61280	100	358.203	35.4	53.5	11.9637		1724	61280	100	30.2976	27.4	52.6	0.212998		56	60908	99.393	3.76792	89.4	56.2	0.127461
Clostridium_beijerinckii_ATCC_35702	3042186b85304e8d_1	6007460	17360354	6007460	100	404.993	35.1	57.3	13.4395	0.0062968	110513	6007459	100	33.5847	23.1	57.9	13.6537	0.0532783	6569	5985655	99.637	5.41362	89.5	59.8	14.9516	0.0583429
Cutibacterium_acnes_ATCC_11828	9dc637a985b042c4_1	2497484	9069878	2497484	100	514.125	35.4	58.1	16.8894	0.00791318	14698	2497484	100	25.0236	28.2	58.7	1.81592	0.00708591	5310	2497484	100	17.7172	85.4	59.9	12.086	0.047161
Deinococcus_radiodurans_ATCC_BAA_816	2b7fa0e1de5f42de_1	2644044	9163259	2643940	99.9961	487.753	35.6	57.6	16.1175	0.0485115	15534	2643986	99.9978	17.3559	29	58.6	1.9192	0.00952003	4721	2643989	99.9979	13.0812	85.5	60	10.7454	0.0549945
Deinococcus_radiodurans_ATCC_BAA_816	2b7fa0e1de5f42de_2	412191	1230733	412109	99.9801	420.279	35.6	57.9	13.8861		2095	412191	100	15.3286	27.8	58.6	0.258834		669	412174	99.9959	11.5317	84.7	59.9	1.5227
Deinococcus_radiodurans_ATCC_BAA_816	2b7fa0e1de5f42de_3	177364	863688	177364	100	686.548	35.5	54.1	22.6468		1384	177364	100	21.497	26.6	57.2	0.170991		478	177364	100	19.6822	86.2	60	1.08797
Deinococcus_radiodurans_ATCC_BAA_816	2b7fa0e1de5f42de_4	45503	455581	45503	100	1410.96	35.3	57.1	46.5631		733	45503	100	44.763	25.7	58.6	0.090561		324	45503	100	44.2431	87.4	59.8	0.737452
Deinococcus_radiodurans_ATCC_BAA_816	2b7fa0e1de5f42de_5	1363	1268	1289	94.5708	127.753	35.7	0.106	4.32653		1	292	21.4233	0.214233	27.8	0	0.000123548		0	0	0	0	0	0	0
Enterococcus_faecalis_ATCC_47077	27b35dd1651e48dd_1	2738556	7907135	2738556	100	405.1	35.1	57.9	13.4281	0.00629144	88622	2738556	100	29.1341	29.9	57.9	10.9491	0.0427247	3280	2738325	99.9916	7.46701	88.2	59.8	7.46556	0.0291315
Escherichia_coli_ATCC_700926	1eb3021faaec49c2_1	4642497	16702013	4642497	100	508.052	35.3	57.5	16.7314	0.00783916	124303	4642497	100	62.1929	29.8	58.2	15.3574	0.0599265	12816	4642496	100	19.2767	87.1	60	29.1703	0.113826
Helicobacter_pylori_ATCC_700392	4762fdd895094939_1	1667794	6343620	1667680	99.9932	536.187	34.9	56.6	17.6893	0.00828795	13764	1667794	100	29.1849	24.5	57.3	1.70052	0.00663563	3162	1667794	100	16.5306	87.1	59.7	7.19699	0.0280835
Lactobacillus_gasseri_ATCC_33323	5964adb8d0df4fde_1	1854273	5902957	1854273	100	449.145	35.1	57.4	14.8051	0.00693663	42477	1854273	100	32.9681	29.5	57.9	5.24797	0.0204782	2650	1854273	100	10.1815	88	59.8	6.03163	0.0235361
Neisseria_meningitidis_ATCC_BAA_335	045df7c7cb0f42b5_1	2240102	8591763	2240050	99.9977	542.013	35.2	55.5	17.8374	0.00835732	12018	2239555	99.9756	22.4465	27.7	57.5	1.48481	0.00579388	4384	2239075	99.9542	16.7166	86.3	59.8	9.97836	0.0389367
Phocaeicola_vulgatus_ATCC_8482	d889f9dd971b473d_1	5163177	17593128	5163177	100	482.248	35.1	56.1	15.8468	0.00742469	22024	5163170	99.9999	14.9086	26.8	57.2	2.72103	0.0106178	9248	5163152	99.9995	14.7476	87.3	59.4	21.0492	0.0821365
Porphyromonas_gingivalis_ATCC_33277	2504aeb524e74d25_1	2399479	7413841	2399479	100	436.824	35.2	52.6	14.3695	0.00673254	18354	2399479	100	19.3997	27.1	54	2.26761	0.00884847	4430	2399479	100	14.4638	86.8	57.4	10.0831	0.0393453
Pseudomonas_aeruginosa_ATCC_9027	285a115d88c043f1_1	6374461	21621904	6374461	100	477.774	35.5	57.9	15.7749	0.00739099	51022	6374461	100	22.8716	30	58.6	6.30369	0.0245977	12131	6374461	100	14.9832	85.1	60	27.6112	0.107742
Rhodobacter_sphaeroides_ATCC_17029	266a835027f7464b_1	3146984	9966406	3146982	99.9999	445.204	35.6	57.2	14.7286	0.0201426	17179	3146984	100	21.1616	28.9	58.5	2.12244	0.0120101	5608	3146982	99.9999	14.6126	84.2	59.6	12.7643	0.0719761
Rhodobacter_sphaeroides_ATCC_17029	266a835027f7464b_2	1218935	4083641	1218855	99.9934	471.054	35.6	57.2	15.5806		7078	1218924	99.9991	22.7799	28.6	58.6	0.874476		2302	1218901	99.9972	15.3196	84.2	59.9	5.23955
Rhodobacter_sphaeroides_ATCC_17029	266a835027f7464b_3	122599	334320	122599	100	381.825	35.6	58.2	12.6821		655	122599	100	20.3601	27.6	58.9	0.0809243		194	122599	100	11.8968	83.5	60	0.441561
Schaalia_odontolytica_ATCC_17982	89e35fec14744942_1	2396044	6635688	2396044	100	384.179	35.6	57.4	12.8798	0.00603453	46354	2396044	100	28.4942	28.2	58.2	5.72697	0.0223473	1725	2213302	92.3732	2.67418	88.7	59.6	3.92625	0.0153207
Staphylococcus_aureus_subsp_aureus_ATCC_BAA_1556	38ad2dab3e5e43b7_1	2472647	6072054	2472647	100	346.389	35.1	57.6	11.4206	0.352417	25955	2472647	100	24.9947	30.2	58.2	3.2067	0.0171628	2362	2464122	99.6552	5.32698	89.3	59.7	5.37612	0.0285542
Staphylococcus_aureus_subsp_aureus_ATCC_BAA_1556	38ad2dab3e5e43b7_2	266548	738074	266548	100	390.579	35.1	56.5	12.8778		3229	266548	100	29.5212	30.4	57.5	0.398938		328	264999	99.4189	6.77027	88.2	60	0.746556
Staphylococcus_aureus_subsp_aureus_ATCC_BAA_1556	38ad2dab3e5e43b7_3	106192	288769	106192	100	382.403	35.1	58.1	12.6466		1378	106192	100	32.1468	31.1	57.8	0.17025		134	106192	100	6.05844	89.3	59.9	0.304996
Staphylococcus_aureus_subsp_aureus_ATCC_BAA_1556	38ad2dab3e5e43b7_4	37136	412412	37136	100	1558.74	34.9	56.5	51.6479		2277	37136	100	125.429	27.6	57.7	0.28132		171	37136	100	23.3453	86.2	60	0.389211
Staphylococcus_aureus_subsp_aureus_ATCC_BAA_1556	38ad2dab3e5e43b7_5	24844	66519	24844	100	377.218	35.1	58.5	12.452		372	24844	100	30.5507	29.2	58.2	0.04596		30	24839	99.9799	5.65992	87.3	60	0.0682826
Staphylococcus_aureus_subsp_aureus_ATCC_BAA_1556	38ad2dab3e5e43b7_6	4439	228402	4439	100	7239.43	34.9	9.72	239.294		1141	4439	100	427.381	27.3	42.3	0.140969		116	4439	100	72.144	90.8	59.6	0.264026
Staphylococcus_aureus_subsp_aureus_ATCC_BAA_1556	38ad2dab3e5e43b7_7	3125	271486	3125	100	11964.5	34.8	57.6	404.03		1248	3125	100	378.798	27.9	55.6	0.154188		74	3125	100	38.6723	91.1	60	0.16843
Staphylococcus_aureus_subsp_aureus_ATCC_BAA_1556	38ad2dab3e5e43b7_8	275	417	275	100	199.811	34.8	42.1	7.05212		0	0	0	0	0	0	0		0	0	0	0	0	0	0
Staphylococcus_aureus_subsp_aureus_ATCC_BAA_1556	38ad2dab3e5e43b7_9	221	36	206	93.2127	17.6923	35.1	1.92	0.757577		0	0	0	0	0	0	0		0	0	0	0	0	0	0
Staphylococcus_epidermidis_ATCC_12228	f5bcb58692924cb7_1	2503245	7283456	2503234	99.9996	410.985	35.1	57	13.5316	0.394385	24691	2503245	100	32.7806	29.3	58.1	3.05054	0.0158018	4537	2503245	100	12.6047	88.3	59.8	10.3266	0.0506426
Staphylococcus_epidermidis_ATCC_12228	f5bcb58692924cb7_2	27017	330140	27017	100	1715.25	35	57.8	56.83		1533	27017	100	140.689	26.2	58.8	0.1894		291	27017	100	46.6278	89.4	60	0.662341
Staphylococcus_epidermidis_ATCC_12228	f5bcb58692924cb7_3	21979	641253	21979	100	4094.03	35	47.7	135.687		2971	21979	100	358.998	27.6	55.8	0.367063		414	21979	100	97.5294	88.2	59.9	0.9423
Staphylococcus_epidermidis_ATCC_12228	f5bcb58692924cb7_4	8007	119490	8007	100	2086.5	35	58.4	69.403		630	8007	100	147.307	30.6	59	0.0778355		112	8007	100	49.4357	90.4	60	0.254922
Staphylococcus_epidermidis_ATCC_12228	f5bcb58692924cb7_5	6585	180979	6585	100	3831.3	34.9	58.3	127.817		853	6585	100	242.145	27.6	58.5	0.105387		143	6585	100	64.5039	91.2	60	0.32548
Staphylococcus_epidermidis_ATCC_12228	f5bcb58692924cb7_6	4679	157017	4679	100	4661.44	34.9	58.3	156.067		837	4679	100	264.645	29	58.8	0.10341		86	4679	100	45.3075	89.2	60	0.195743
Staphylococcus_epidermidis_ATCC_12228	f5bcb58692924cb7_7	4439	269563	4439	100	8588.06	34.9	12.7	282.417		1262	4439	100	452.502	27.2	40.8	0.155918		119	4439	100	67.7885	90.2	58.2	0.270854
Streptococcus_agalactiae_ATCC_BAA_611	58ae911973b74ffc_1	2159783	6286710	2159783	100	411.498	35.1	56.9	13.5372	0.00634258	12401	2159780	99.9999	13.5527	27.6	57.7	1.53212	0.00597852	2580	2158361	99.9342	8.20085	88.1	59.9	5.8723	0.0229144
Streptococcus_mutans_ATCC_700610	adb6d513b7374f84_1	2031444	6697844	2031444	100	466.603	35.1	57.4	15.3337	0.00718427	11541	2031444	100	16.0749	27.6	57.7	1.42587	0.00556392	3605	2031444	100	13.8286	87.8	60	8.20529	0.032018
									2134.34								256.271								256.271
